# Supplementary material
Source: publisher figshare collection journal article supplement (https://karger.figshare.com/articles/dataset/_/16644856)
Supplement: Supplementary file 1 [file 1]

**Supplementary File 1.** Search strategy

*MEDLINE (OVID)*

1 exp Esophagitis/

2 esophag*.tw.

3 oesophag*.tw.

4 1 or 2 or 3

5 exp Eosinophils/

6 exp Eosinophilia/

7 eosinophil*.tw.

8 5 or 6 or 7

9 4 and 8

10 Epidemiologic Studies/

11 exp Case-Control Studies/

12 exp Cohort Studies/

13 Cross-Sectional Studies/

14 (epidemiologic adj (study or studies)).tw.

15 case control.tw.

16 (cohort adj (study or studies)).tw.

17 cross sectional.tw.

18 cohort analy*.tw.

19 (follow up adj (study or studies)).tw.

20 longitudinal.tw.

21 retrospective*.tw.

22 prospective*.tw.

23 (observ$ adj3 (study or studies)).tw.

24 adverse effect?.tw.

25 10 or 11 or 12 or 13 or 14 or 15 or 16 or 17 or 18 or 19 or 20 or 21 or 22 or 23 or 24

26 ((identify$ or develop$ or design$ or test$ or assess$ or evaluat$ or robust$ or optim$

or effic$ or effect$ or sensitiv$ or simpl$ or specific$ or precis$) adj3 (search strat$ or

search filter?)).tw.

27 25 and 26

28 exp animals/ not humans/

29 25 not 28

30 9 and 29

31 swallowed.tw.

32 exp Administration, Topical/

33 exp Steroids/

34 fluticasone.tw.

35 mometasone.tw.

36 exp Budesonide/

37 corticosteroid*.tw.

38 exp Glucocorticoids/

39 31 or 32 or 33 or 34 or 35 or 36 or 37 or 38

40 30 and 39

41 exp Diet/

42 diet.tw.

43 dieta*.tw.

44 diete*.tw.

45 41 or 42 or 43 or 44

46 30 and 45

47 dilation*.tw.

48 dilatation*.tw.

49 47 or 48

50 30 and 49

51 40 or 46 or 50

52 exp "review"/

53 51 not 52

**Supplementary Figure 1.** The flow diagram.
